# Supplementary material for: Video-based instructions for surgical hand disinfection as a replacement for conventional tuition? A randomised, blind comparative study
Source: PubMed Central journal article supplement (PMC5003145; doi:10.3205/zma001056), 2016-08-15
Supplement: JME-33-57-s-001.pdf [file JME-33-57-s-001.pdf]

| <b>Surgical hand disinfection with a disinfectant containing alcohol</b>                            |           |            |
|-----------------------------------------------------------------------------------------------------|-----------|------------|
| <b>Assessment</b>                                                                                   | <b>No</b> | <b>Yes</b> |
|                                                                                                     | 0         | 1          |
| <b>Preparation:</b>                                                                                 |           | 6 points   |
| The hands have no wounds, nails are cut short, are clean and without nail varnish ( <b>female</b> ) |           |            |
| No rings or watches                                                                                 |           |            |
| Cap fitted correctly                                                                                |           |            |
| Mask fitted correctly                                                                               |           |            |
| Eye protection has been put on                                                                      |           |            |
| <b>No</b> pre-cleaning of the hands with soap and water                                             |           |            |
| <b>Surgical hand disinfection</b>                                                                   |           | 15 points  |
| Disinfectant is taken out with elbow                                                                |           |            |
| <b>1<sup>st</sup> minute, from finger tips up to the elbows</b>                                     |           |            |
| <b>2<sup>nd</sup> minute, from the finger tips to the middle of the lower arm</b>                   |           |            |
| <b>3<sup>rd</sup> minute, only in the area of the hands themselves disinfected.</b>                 |           |            |
| Fingers                                                                                             |           |            |
| Between the fingers                                                                                 |           |            |
| Palms of the hands                                                                                  |           |            |
| Thumbs                                                                                              |           |            |
| Total application time and rules are complied with                                                  |           |            |
| <b>Correct position of hands is complied with:</b><br>Hands and arms bent at the elbows             |           |            |
| <b>Correct position of hands is complied with:</b><br>Hands are held vertically upwards             |           |            |
| <b>Correct position of hands is complied with:</b><br>The hands are in the highest position         |           |            |
| <b>Sufficient disinfection is used,</b><br>arms and hands are always moist                          |           |            |
| <b>Sterility is ensured</b><br>no touching of unsterile area                                        |           |            |
| Letting disinfectant take effect and dry and not wiping it off.                                     |           |            |

| <b>Assessment</b>              | <b>No</b>       | <b>Yes</b> |
|--------------------------------|-----------------|------------|
|                                | <b>1</b>        | <b>0</b>   |
| <b>Quality of disinfection</b> | <b>7 points</b> |            |
| <b>Residue on:</b>             |                 |            |
| Fingertips                     |                 |            |
| Between fingers                |                 |            |
| Palms of hands                 |                 |            |
| Between fingers and thumbs     |                 |            |
